# Supplementary material
Source: Springer Nature journal article supplement (https://www.springermedizin.de/resource/supplementary/12888_2011_930_MOESM2_ESM.pdf/9478556)
Supplement: MOESM2 [file 9478556]

Step 1:  
Develop standard  
for content of  
referral letters

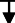

Step 2:  
Validate checklist  
for quality of  
referral letters

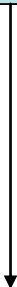

Step 3:  
Develop valid  
outcome measures

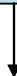

Step 4:  
Controlled intervention trial
